# Supplementary material for: Evolution of Basic Activities of Daily Living Function in Older Patients One Year After Transcatheter Aortic Valve Implantation
Source: PubMed Central journal article supplement — J Am Geriatr Soc. 2020 Nov 6;69(2):500–5. doi: 10.1111/jgs.16927 (PMC7894317; doi:10.1111/jgs.16927), 2020-11-06
Supplement: JGS-69-500-s001.pdf [file JGS-69-500-s001.pdf]

## Evolution of Basic Activities of Daily Living Function in Older Patients One Year After Transcatheter Aortic Valve Implantation (TAVI)

### Supporting information

**Figure S1.** Study design

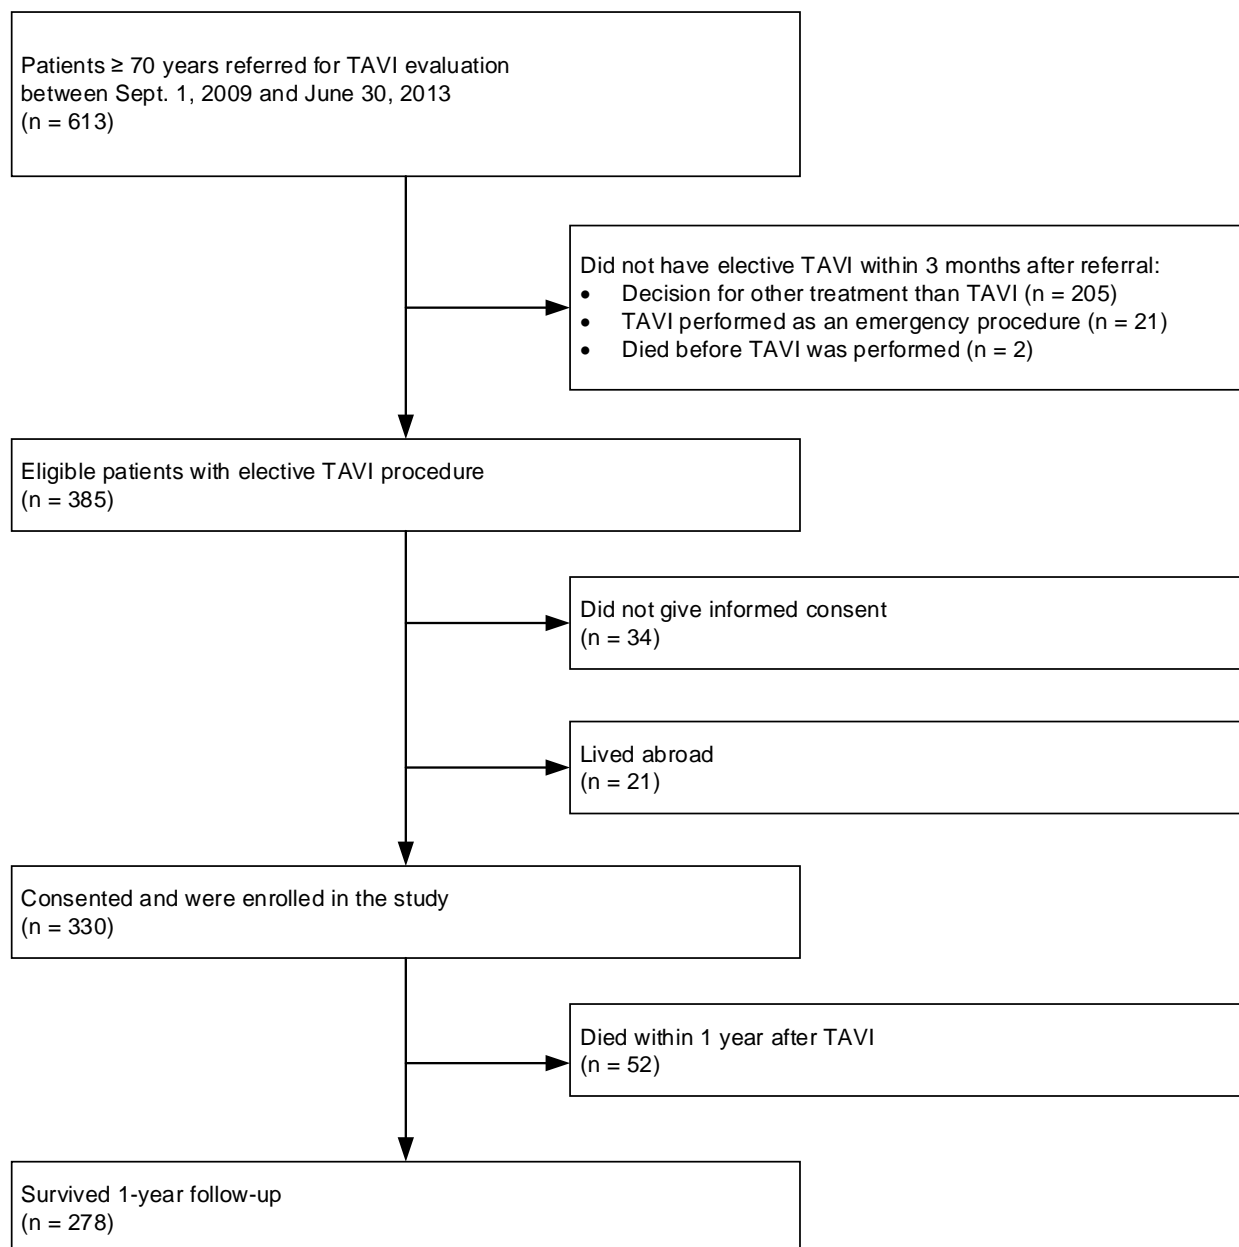

Subject flow in the cohort. TAVI = Transcatheter aortic valve implantation
